# Supplementary material for: Characterisation of T cell receptor repertoires in coeliac disease
Source: J Clin Pathol. 2022 Dec 15;77(2):116–24. doi: 10.1136/jcp-2022-208541 (PMC10850686; doi:10.1136/jcp-2022-208541)
Supplement: Supplementary data [file jcp-2022-208541supp004.xlsx]

## Sheet: LPL PBMC Samples
sample_name	UPRs	Total_templates	Sum_of_TCRs_found	Sum_of_templates_of_TCR_found	Group	Type	Disease
ACD_1-LPLs-TCRB	3628	8979	1	1	Celiac	LPC	ACD		The database TCRs were found in
ACD_2-LPLs-TCRB	2328	2704	0	0	Celiac	LPC	ACD		3 out of 8 ACD samples
ACD_LPL_488_TCRB	9996	16267	0	0	Celiac	LPC	ACD		4 out of 7 GFD samples
ACD_LPL_489_TCRB	9546	19375	0	0	Celiac	LPC	ACD		2 out of 3 RCD samples.
LPL_484_ACD_TCRB	12867	29082	0	0	Celiac	LPC	ACD		1 out of 6 Control Samples
LPL_442_ACD_TCRB	8102	12876	0	0	Celiac	LPC	ACD
LPL_502_ACD_TCRB	10741	22761	9	18	Celiac	LPC	ACD		9 out of 18 Celiac (ACD, GFD, RCD) samples
LPL_503_ACD_TCRB	11577	23411	6	13	Celiac	LPC	ACD		versus 1 out of 6
ACD_1-PBMC-TCRB	59626	85952	0	0	Celiac	PBMC	ACD
ACD_2-PBMC-TCRB	244767	295862	3	3	Celiac	PBMC	ACD
GFD_1-LPLs-TCRB	1661	5184	1	55	Celiac	LPC	GFD			Range	Mean of number of TCRs found
GFD_2-LPLs-TCRB	2050	7805	0	0	Celiac	LPC	GFD		ACD	`1-9	2
GFD_LPL_490_TCRB	3667	7238	5	6	Celiac	LPC	GFD		GFD	`1-8	2.42857
LPL_473_GFD_TCRB	10916	37047	0	0	Celiac	LPC	GFD		RCD	`1-10	3.66667
LPL_480_GFD_TCRB	4249	12348	3	3	Celiac	LPC	GFD
LPL_481_GFD_TCRB	8256	15865	0	0	Celiac	LPC	GFD
LPL_499_RCD_TCRB	8188	20024	8	16	Celiac	LPC	GFD
GFD_1-PBMC-TCRB	101224	123961	2	2	Celiac	PBMC	GFD
GFD_2-PBMC-TCRB	110928	134957	0	0	Celiac	PBMC	GFD
LPL_454_RCD_TCRB	7899	24683	10	12	Celiac	LPC	RCD
LPL_486_RCD_TCRB	11040	20944	0	0	Celiac	LPC	RCD
LPL_493_RCD_TCRB	15884	38282	1	1	Celiac	LPC	RCD
Control_1-LPLs-TCRB	2895	5661	0	0	Control	LPC	Control
Control_2-LPLs-TCRB	4082	7866	0	0	Control	LPC	Control
Control_LPL_15226_TCRB	5137	26247	0	0	Control	LPC	Control
Control_LPL_24247_TCRB	5826	19076	0	0	Control	LPC	Control
Control_LPL_24330_TCRB	6878	20127	1	1	Control	LPC	Control
Control_LPL_24980_TCRB	6733	31794	0	0	Control	LPC	Control
Control_1-PBMC-TCRB	178356	199402	1	1	Control	PBMC	Control
Control_2-PBMC-TCRB	113893	136382	0	0	Control	PBMC	Control

## Sheet: Presence-Absence TCRB QuerySeq
	CASSLGALEETQYF.TCRBV05.01.TCRBJ02.05	CASSIRSTDTQYF.TCRBV07.02.TCRBJ02.03	CASSERAGGGYTF.TCRBV02.X.TCRBJ01.02	CASSWGQGDYGYTF.TCRBV05.01.TCRBJ01.02	CASSLRTTDTQYF.TCRBV07.02.TCRBJ02.03	CASSFRSTDTQYF.TCRBV07.02.TCRBJ02.03	CASSRRDSQETQYF.TCRBV07.02.TCRBJ02.05	CASSQVNRHNEQFF.TCRBV04.03.TCRBJ02.01	CASSRGGVYNEQFF.TCRBV14.X.TCRBJ02.01	CASSIRATDTQYF.TCRBV07.02.TCRBJ02.03	CASSIRTTDTQYF.TCRBV07.02.TCRBJ02.03	CASSFDGETQYF.TCRBV05.01.TCRBJ02.05	CASSIRYTDTQYF.TCRBV07.02.TCRBJ02.03	CASSLRTGEETQYF.TCRBV07.02.TCRBJ02.05	CSVGPVSTDTQYF.TCRBV29.01.TCRBJ02.03	CASSVRFTDTQYF.TCRBV07.02.TCRBJ02.03	CASSLRATDTQYF.TCRBV07.02.TCRBJ02.03	CASSIRFTDTQYF.TCRBV07.02.TCRBJ02.03	CASSIRGTDTQYF.TCRBV07.03.TCRBJ02.03	CASSLRSTDTQYF.TCRBV07.02.TCRBJ02.03	CATSRAGGGGEKLFF.TCRBV15.X.TCRBJ01.04	CASSQGSGGNEQFF.TCRBV04.03.TCRBJ02.01	CASSLRGTDTQYF.TCRBV07.03.TCRBJ02.03
ACD_1-LPLs-TCRB	0	0	0	0	0	1	0	0	0	0	0	0	0	0	0	0	0	0	0	0	0	0	0
ACD_2-LPLs-TCRB	0	0	0	0	0	0	0	0	0	0	0	0	0	0	0	0	0	0	0	0	0	0	0
ACD_1-PBMC-TCRB	0	0	0	0	0	0	0	0	0	0	0	0	0	0	0	0	0	0	0	0	0	0	0
ACD_2-PBMC-TCRB	0	1	0	0	0	0	0	0	0	0	0	0	0	1	0	0	0	0	0	0	0	0	1
ACD_LPL_488_TCRB	0	0	0	0	0	0	0	0	0	0	0	0	0	0	0	0	0	0	0	0	0	0	0
ACD_LPL_489_TCRB	0	0	0	0	0	0	0	0	0	0	0	0	0	0	0	0	0	0	0	0	0	0	0
GFD_1-LPLs-TCRB	0	0	1	0	0	0	0	0	0	0	0	0	0	0	0	0	0	0	0	0	0	0	0
GFD_2-LPLs-TCRB	0	0	0	0	0	0	0	0	0	0	0	0	0	0	0	0	0	0	0	0	0	0	0
GFD_1-PBMC-TCRB	0	0	0	0	0	0	1	0	0	0	0	1	0	0	0	0	0	0	0	0	0	0	0
GFD_2-PBMC-TCRB	0	0	0	0	0	0	0	0	0	0	0	0	0	0	0	0	0	0	0	0	0	0	0
GFD_LPL_490_TCRB	0	1	0	0	0	1	0	0	0	0	0	0	0	0	1	0	1	0	0	0	0	1	0
LPL_484_ACD_TCRB	0	0	0	0	0	0	0	0	0	0	0	0	0	0	0	0	0	0	0	0	0	0	0
LPL_442_ACD_TCRB	0	0	0	0	0	0	0	0	0	0	0	0	0	0	0	0	0	0	0	0	0	0	0
LPL_502_ACD_TCRB	0	1	0	0	1	2	0	0	0	0	1	0	0	0	0	0	0	1	0	0	1	2	0
LPL_503_ACD_TCRB	0	0	0	2	1	2	0	0	0	0	0	0	0	0	0	0	0	0	0	1	0	0	0
LPL_473_GFD_TCRB	0	0	0	0	0	0	0	0	0	0	0	0	0	0	0	0	0	0	0	0	0	0	0
LPL_480_GFD_TCRB	0	0	0	0	0	0	0	0	0	0	0	0	0	0	0	0	1	0	1	1	0	0	0
LPL_481_GFD_TCRB	0	0	0	0	0	0	0	0	0	0	0	0	0	0	0	0	0	0	0	0	0	0	0
LPL_454_RCD_TCRB	0	3	0	0	0	2	0	0	0	0	1	1	1	0	0	0	0	0	0	2	0	0	0
LPL_486_RCD_TCRB	0	0	0	0	0	0	0	0	0	0	0	0	0	0	0	0	0	0	0	0	0	0	0
LPL_493_RCD_TCRB	0	0	0	0	0	0	0	0	0	1	0	0	0	0	0	0	0	0	0	0	0	0	0
LPL_499_RCD_TCRB	0	1	0	0	1	0	0	1	1	1	0	0	0	0	0	1	0	1	0	1	0	0	0
Control_1-LPLs-TCRB	0	0	0	0	0	0	0	0	0	0	0	0	0	0	0	0	0	0	0	0	0	0	0
Control_2-LPLs-TCRB	0	0	0	0	0	0	0	0	0	0	0	0	0	0	0	0	0	0	0	0	0	0	0
Control_1-PBMC-TCRB	0	0	0	0	0	0	0	0	0	0	0	1	0	0	0	0	0	0	0	0	0	0	0
Control_2-PBMC-TCRB	0	0	0	0	0	0	0	0	0	0	0	0	0	0	0	0	0	0	0	0	0	0	0
Control_LPL_15226_TCRB	0	0	0	0	0	0	0	0	0	0	0	0	0	0	0	0	0	0	0	0	0	0	0
Control_LPL_24247_TCRB	0	0	0	0	0	0	0	0	0	0	0	0	0	0	0	0	0	0	0	0	0	0	0
Control_LPL_24330_TCRB	1	0	0	0	0	0	0	0	0	0	0	0	0	0	0	0	0	0	0	0	0	0	0
Control_LPL_24980_TCRB	0	0	0	0	0	0	0	0	0	0	0	0	0	0	0	0	0	0	0	0	0	0	0
Total matching TCR sequences observed	1	7	1	2	3	8	1	1	1	2	2	3	1	1	1	1	2	2	1	5	1	3	1
Total Number of Sample Observed	1	5	1	1	3	5	1	1	1	2	2	3	1	1	1	1	2	2	1	4	1	2	1

## Sheet: Template # TCRB in QuerySamples
	CASSLGALEETQYF.TCRBV05.01.TCRBJ02.05	CASSIRSTDTQYF.TCRBV07.02.TCRBJ02.03	CASSERAGGGYTF.TCRBV02.X.TCRBJ01.02	CASSWGQGDYGYTF.TCRBV05.01.TCRBJ01.02	CASSLRTTDTQYF.TCRBV07.02.TCRBJ02.03	CASSFRSTDTQYF.TCRBV07.02.TCRBJ02.03	CASSRRDSQETQYF.TCRBV07.02.TCRBJ02.05	CASSQVNRHNEQFF.TCRBV04.03.TCRBJ02.01	CASSRGGVYNEQFF.TCRBV14.X.TCRBJ02.01	CASSIRATDTQYF.TCRBV07.02.TCRBJ02.03	CASSIRTTDTQYF.TCRBV07.02.TCRBJ02.03	CASSFDGETQYF.TCRBV05.01.TCRBJ02.05	CASSIRYTDTQYF.TCRBV07.02.TCRBJ02.03	CASSLRTGEETQYF.TCRBV07.02.TCRBJ02.05	CSVGPVSTDTQYF.TCRBV29.01.TCRBJ02.03	CASSVRFTDTQYF.TCRBV07.02.TCRBJ02.03	CASSLRATDTQYF.TCRBV07.02.TCRBJ02.03	CASSIRFTDTQYF.TCRBV07.02.TCRBJ02.03	CASSIRGTDTQYF.TCRBV07.03.TCRBJ02.03	CASSLRSTDTQYF.TCRBV07.02.TCRBJ02.03	CATSRAGGGGEKLFF.TCRBV15.X.TCRBJ01.04	CASSQGSGGNEQFF.TCRBV04.03.TCRBJ02.01	CASSLRGTDTQYF.TCRBV07.03.TCRBJ02.03
ACD_1-LPLs-TCRB	0	0	0	0	0	1	0	0	0	0	0	0	0	0	0	0	0	0	0	0	0	0	0
ACD_2-LPLs-TCRB	0	0	0	0	0	0	0	0	0	0	0	0	0	0	0	0	0	0	0	0	0	0	0
ACD_1-PBMC-TCRB	0	0	0	0	0	0	0	0	0	0	0	0	0	0	0	0	0	0	0	0	0	0	0
ACD_2-PBMC-TCRB	0	1	0	0	0	0	0	0	0	0	0	0	0	1	0	0	0	0	0	0	0	0	1
ACD_LPL_488_TCRB	0	0	0	0	0	0	0	0	0	0	0	0	0	0	0	0	0	0	0	0	0	0	0
ACD_LPL_489_TCRB	0	0	0	0	0	0	0	0	0	0	0	0	0	0	0	0	0	0	0	0	0	0	0
GFD_1-LPLs-TCRB	0	0	55	0	0	0	0	0	0	0	0	0	0	0	0	0	0	0	0	0	0	0	0
GFD_2-LPLs-TCRB	0	0	0	0	0	0	0	0	0	0	0	0	0	0	0	0	0	0	0	0	0	0	0
GFD_1-PBMC-TCRB	0	0	0	0	0	0	1	0	0	0	0	1	0	0	0	0	0	0	0	0	0	0	0
GFD_2-PBMC-TCRB	0	0	0	0	0	0	0	0	0	0	0	0	0	0	0	0	0	0	0	0	0	0	0
GFD_LPL_490_TCRB	0	1	0	0	0	1	0	0	0	0	0	0	0	0	1	0	1	0	0	0	0	2	0
LPL_484_ACD_TCRB	0	0	0	0	0	0	0	0	0	0	0	0	0	0	0	0	0	0	0	0	0	0	0
LPL_442_ACD_TCRB	0	0	0	0	0	0	0	0	0	0	0	0	0	0	0	0	0	0	0	0	0	0	0
LPL_502_ACD_TCRB	0	4	0	0	1	7	0	0	0	0	1	0	0	0	0	0	0	2	0	0	1	2	0
LPL_503_ACD_TCRB	0	0	0	6	1	5	0	0	0	0	0	0	0	0	0	0	0	0	0	1	0	0	0
LPL_473_GFD_TCRB	0	0	0	0	0	0	0	0	0	0	0	0	0	0	0	0	0	0	0	0	0	0	0
LPL_480_GFD_TCRB	0	0	0	0	0	0	0	0	0	0	0	0	0	0	0	0	1	0	1	1	0	0	0
LPL_481_GFD_TCRB	0	0	0	0	0	0	0	0	0	0	0	0	0	0	0	0	0	0	0	0	0	0	0
LPL_454_RCD_TCRB	0	4	0	0	0	3	0	0	0	0	1	1	1	0	0	0	0	0	0	2	0	0	0
LPL_486_RCD_TCRB	0	0	0	0	0	0	0	0	0	0	0	0	0	0	0	0	0	0	0	0	0	0	0
LPL_493_RCD_TCRB	0	0	0	0	0	0	0	0	0	1	0	0	0	0	0	0	0	0	0	0	0	0	0
LPL_499_RCD_TCRB	0	5	0	0	1	0	0	4	1	1	0	0	0	0	0	2	0	1	0	1	0	0	0
Control_1-LPLs-TCRB	0	0	0	0	0	0	0	0	0	0	0	0	0	0	0	0	0	0	0	0	0	0	0
Control_2-LPLs-TCRB	0	0	0	0	0	0	0	0	0	0	0	0	0	0	0	0	0	0	0	0	0	0	0
Control_1-PBMC-TCRB	0	0	0	0	0	0	0	0	0	0	0	1	0	0	0	0	0	0	0	0	0	0	0
Control_2-PBMC-TCRB	0	0	0	0	0	0	0	0	0	0	0	0	0	0	0	0	0	0	0	0	0	0	0
Control_LPL_15226_TCRB	0	0	0	0	0	0	0	0	0	0	0	0	0	0	0	0	0	0	0	0	0	0	0
Control_LPL_24247_TCRB	0	0	0	0	0	0	0	0	0	0	0	0	0	0	0	0	0	0	0	0	0	0	0
Control_LPL_24330_TCRB	1	0	0	0	0	0	0	0	0	0	0	0	0	0	0	0	0	0	0	0	0	0	0
Control_LPL_24980_TCRB	0	0	0	0	0	0	0	0	0	0	0	0	0	0	0	0	0	0	0	0	0	0	0
Total matching TCR templates observed	1	15	55	6	3	17	1	4	1	2	2	3	1	1	1	2	2	3	1	5	1	4	1
Total Number of Sample	1	5	1	1	3	5	1	1	1	2	2	3	1	1	1	1	2	2	1	4	1	2	1
